# Supplementary material
Source: PubMed Central journal article supplement (PMC1483180)
Supplement: JCI0629024sd.pdf [file JCI0629024sd.pdf]

- S1. Port, S.C., et al. 2006. The predictive role of blood glucose for mortality in subjects with cardiovascular disease. *Am. J. Epidemiol.* **163**:342–351.
- S2. Sattar, N., et al. 2003. Metabolic syndrome with and without C-reactive protein as a predictor of coronary heart disease and diabetes in the West of Scotland Coronary Prevention Study. *Circulation.* **108**:414–419.
- S3. Despres, J.P., Golay, A., and Sjostrom, L. 2005. Effects of rimonabant on metabolic risk factors in overweight patients with dyslipidemia. *N. Engl. J. Med.* **353**:2121–2134.
- S4. Becker, R.A., et al. 1982. Hypermetabolic low triiodothyronine syndrome of burn injury. *Crit. Care Med.* **10**:870–875.
- S5. Fletcher, J.A. 2004. Role of KIT and platelet-derived growth factor receptors as oncoproteins. *Semin. Oncol.* **31**:4–11.
- S6. Jennings, R.B., Kaltenbach, J.P., and Sommers, H.M. 1967. Mitochondrial metabolism in ischemic injury. *Arch. Pathol.* **84**:15–19.
- S7. Watts, H. 1963. In *Evolution of the atherosclerotic plaque*. R.J. Jones, editor. University of Chicago. Chicago, Illinois, USA. p. 117.
- S8. Hayashida, T., and Portman, O.W. 1960. Swelling of liver mitochondria from rats fed diets deficient in essential fatty acids. *Proc. Soc. Exp. Biol. Med.* **103**:656–659.
- S9. Lopez-Lluch, G., et al. 2006. Calorie restriction induces mitochondrial biogenesis and bioenergetic efficiency. *Proc. Natl. Acad. Sci. U. S. A.* **103**:1768–1773.
